# Supplementary material
Source: publisher figshare collection journal article supplement (https://karger.figshare.com/ndownloader/files/24016232)
Supplement: Supplementary file 1 [file 24016232]

**SUPPLEMENTAL INFORMATION ONLINE-ONLY CONTENT**

**Effects of white matter hyperintensities on 90-day functional outcome after large vessel and non-large vessel stroke**

Christoph J. Griessenauer1,2, David McPherson3, Andrea Berger4, Ping Cuiper4, Nelson Sofoluke1, Matthew D. Adams3, Saran Kunaprayoon3, Ramin Zand5, Jiang Li6, Vida Abedi6,7, Oded Goren1, Clemens M. Schirmer1, Kathleen Donahue8, Marco Nardin8, Anne-Karin Giese8, Markus D. Schirmer8, Natalia S. Rost8, Philipp Hendrix1,9

1Department of Neurosurgery, Geisinger, Danville, PA

2Research Institute of Neurointervention, Paracelsus Medical University, Salzburg, Austria

3Geisinger Commonwealth School of Medicine, Scranton, PA

4Biostatistics Core, Geisinger, Danville, PA

5Department of Neurology, Geisinger, Danville, PA

6Department of Molecular and Functional Genomics, Geisinger, Danville, PA

7Biocomplexity Institute, Virginia Tech, Blacksburg, VA, USA.

8Department of Neurology, Massachusetts General Hospital, Harvard Medical School, Boston, MA

9Department of Neurosurgery, Saarland University Medical Center and Saarland University Faculty of Medicine, Homburg/Saar, Germany

**Supplemental Tables**

Table 1. Variables used in Multiple Imputation Process

| Variable Name | Missing % (Out of n = 1601) |
| --- | --- |
| ReStroked_within_1year | 0.0% |
| TOAST_Stroke_Subtype | 0.0% |
| Year_admitted (year) | 0.0% |
| Age | 0.0% |
| Female | 0.0% |
| BMI_30above | 0.0% |
| Intracranial_Arterio | 0.0% |
| MoyaMoya | 0.0% |
| Dementia | 0.0% |
| Parkinsons | 0.0% |
| Peripheral_Vasc_Disease | 0.0% |
| Anema | 0.0% |
| Procoagulant | 0.0% |
| COPD | 0.0% |
| Sleep_Apnea | 0.0% |
| Hypertension | 0.0% |
| Diabetes_mellitus2 | 0.0% |
| Carotid_Stenosis | 0.0% |
| Dyslipidemia | 0.0% |
| Coronary_artery_disease | 0.0% |
| Atrial_Fib | 0.0% |
| prior_TIA | 0.0% |
| prior_IS_HS_CVA | 0.0% |
| Family_History | 0.0% |
| Smoking_Status | 1.8% |
| Drinking | 5.6% |
| NIHS_Admission (nihss_at_admission) | 4.6% |
| LVO | 0.0% |
| LVO_prox_Circ_IM1M2 (anterior_lvo) | 0.0% |
| Stroke_Therapy_ivTPA_Embolectomy | 0.0% |
| secondary_ICH | 0.0% |
| discharge_ASPIRIN | 0.0% |
| discharge_CLOPIDOGREL | 0.0% |
| discharge_Antiocoagulation | 0.0% |
| discharge_Brillinta | 0.0% |
| discharge_Prasugrel | 0.0% |
| Outcome_90d_mRS02 | 0.0% |
| Outcome_90d_mRS6 | 0.0% |
| HOME_Platelets_None_Mono_Duo | 0.0% |
| HOME_Anticoag | 0.0% |
| HOME_Statins | 0.0% |
| HOME_AT1_ACEinhib | 0.0% |
| HOME_Beta_Blocker | 0.0% |
| HOme_Metformin | 0.0% |
| Home_Oral_Antidiabetics | 0.0% |
| WMH_volume | 19.7% |
| Stroke sequence | 0.0% |

Table 2: Comparison of the characteristics of strokes with and without WMH volumes

|  | **WMH Volume Missing (n = 316)** | **WMH Volume Present (n = 1285)** | **P-value*** |
| --- | --- | --- | --- |
| Age, Mean (SD)/Median (IQR) | 70.1 (14.0)/ 72 (60, 81) | 67.1 (13.2)/ 68 (58, 77) | 0.0003 |
| Male, n (%) | 169 (53.5) | 644 (50.1) | 0.2865 |
| History of Hypertension, n (%) | 254 (80.4) | 1010 (78.6) | 0.5379 |
| History of Type II Diabetes, n (%) | 129 (40.8) | 492 (38.3) | 0.4394 |
| Dyslipidemia, n (%) | 221 (69.9) | 927 (72.1) | 0.4437 |
| Current or Former Smoker, n (%)  *Missing, n* | 202 (66.2) *11* | 752 (59.4) *18* | 0.0311 |
| Alcohol Consumption, n (%) *Missing, n* | 103 (35.0) *22* | 449 (36.9) *67* | 0.5895 |
| BMI ≥ 30, n (%) | 163 (51.6) | 592 (46.1) | 0.0894 |
| Peripheral Vascular Disease, n (%) | 34 (10.8) | 127 (9.9) | 0.6762 |
| Coronary Artery Disease, n (%) | 125 (39.6) | 352 (27.4) | < 0.0001 |
| Atrial Fibrillation, n (%) | 113 (35.8) | 242 (18.8) | < 0.0001 |
| Carotid Stenosis, n (%) | 121 (38.3) | 486 (37.8) | 0.8971 |
| Intracranial Atherosclerotic Stenosis, n (%) | 89 (28.2) | 394 (30.7) | 0.4120 |
| Anemia, n (%) | 55 (17.4) | 188 (14.6) | 0.2211 |
| Pro-Coagulant Coagulation Disorder, n (%) | 15 (4.7) | 56 (4.4) | 0.7607 |
| COPD, n (%) | 53 (16.8) | 135 (10.5) | 0.0033 |
| Sleep Apnea, n (%) | 38 (12.0) | 132 (10.3) | 0.3601 |
| Family History of Stroke, n (%) | 68 (21.5) | 290 (22.6) | 0.7072 |
| Prior TIA, n (%) | 47 (14.9) | 144 (11.2) | 0.0809 |
| Prior Stroke (hemorrhagic or ischemic), n (%) | 75 (23.7) | 267 (20.8) | 0.2513 |
| mRS 0-2 (Favorable) | 167 (52.8) | 907 (70.6) | < 0.0001 |

*P-value: Continuous variables were compared using Wilcoxon rank-sum tests and categorical variables were compared using Fisher’s exact tests.

Table 3. Baseline demographic and stroke risk factor characteristics among encounters with values of WMH (n=1,285)

|  | **Entire Cohort (n = 1285)** | **mRS 0-2 Favorable (n = 907)** | **mRS 3-6 Unfavorable (n = 378)** | **P-value*** |
| --- | --- | --- | --- | --- |
| Age (years) (median [IQR], mean ± SD) | 68 [58 – 77],  67.1 ± 13.2 | 66 [57 – 75],  65.4 ± 13.2 | 73 [63 – 81],  71.4 ± 12.4 | < 0.0001 |
| Females, n (%) | 641 (49.9%) | 430 (47.4%) | 211 (55.8%) | 0.0070 |
| History of hypertension, n (%) | 1010 (78.6%) | 684 (75.4%) | 326 (86.2%) | < 0.0001 |
| Diabetes mellitus type 2, n (%) | 492 (38.3%) | 311 (34.3%) | 181 (47.9%) | < 0.0001 |
| Dyslipidemia, n (%) | 927 (72.1%) | 640 (70.6%) | 287 (75.9%) | 0.0558 |
| Current or former smoker, n (%) *Missing, n* | 752 (58.5%) *18* | 540 (60.1%) *8* | 212 (57.6%) *10* | 0.4497 |
| Alcohol consumption, n (%) *Missing, n* | 449 (36.9%) *67* | 341 (39.5%) *44* | 108 (30.4%) *23* | 0.0032 |
| BMI ≥ 30, n (%) | 592 (46.1%) | 419 (46.2%) | 173 (45.8%) | 0.9024 |
| Peripheral vascular disease, n (%) | 127 (9.9%) | 74 (8.2%) | 53 (14.0%) | 0.0020 |
| Coronary artery disease, n (%) | 352 (27.4%) | 223 (24.6%) | 129 (34.1%) | 0.0006 |
| Atrial fibrillation, n (%) | 242 (18.8%) | 147 (16.2%) | 95 (25.1%) | 0.0003 |
| Carotid stenosis, n (%) | 486 (37.8%) | 344 (37.9%) | 142 (37.6%) | 0.9497 |
| Intracranial atherosclerotic stenosis, n (%) | 394 (30.7%) | 273 (30.1%) | 121 (32.0%) | 0.5072 |
| Anemia, n (%) | 188 (14.6%) | 100 (11.0%) | 88 (23.3%) | < 0.0001 |
| Pro-coagulant coagulation disorder, n (%) | 56 (4.4%) | 34 (3.8%) | 22 (5.8%) | 0.1009 |
| COPD, n (%) | 135 (10.5%) | 80 (8.8%) | 55 (14.6%) | 0.0036 |
| Sleep apnea, n (%) | 132 (10.3%) | 84 (9.3%) | 48 (12.7%) | 0.0697 |
| Family history of stroke, n (%) | 290 (22.6%) | 193 (21.3%) | 97 (25.7%) | 0.0923 |
| Prior TIA, n (%) | 144 (11.2%) | 95 (10.5%) | 49 (13.0%) | 0.2075 |
| Prior stroke (hemorrhagic or ischemic), n (%) | 267 (20.8%) | 164 (18.1%) | 103 (27.3%) | 0.0003 |

*P-value: Continuous variables were compared using Wilcoxon rank-sum tests and categorical variables were compared using Fisher’s exact tests.

Table 4. Imaging, stroke, and treatment characteristics among encounters with values of WMH (n=1,285)

|  | **Entire Cohort (n = 1285)** | **mRS 0-2 Favorable (n = 907)** | **mRS 3-6 Unfavorable (n = 378)** | **P-value*** |
| --- | --- | --- | --- | --- |
| White matter hyperintensity volume (median [IQR]) | 3.13 [1.02 – 7.50] | 2.50 [0.77 – 6.44] | 4.44 [1.93 – 9.53] | < 0.0001 |
| LVO, n (%) | 280 (21.8%) | 168 (18.5%) | 112 (29.6%) | < 0.0001 |
| Anterior (IM1M2) LVO, n (%) | 183 (14.2%) | 108 (11.9%) | 75 (19.8%) | 0.0003 |
| TOAST Subtype, n (%) |  |  |  | 0.4197 |
| Cardioembolism | 366 (28.5%) | 252 (27.8%) | 114 (30.2%) |
| Large-artery atherosclerosis | 318 (24.8%) | 224 (24.7%) | 94 (24.9%) |
| Small vessel occlusion | 234 (18.2%) | 176 (19.4%) | 58 (15.3%) |
| Stroke of undetermined etiology | 319 (24.8%) | 224 (24.7%) | 95 (25.1%) |
| Stroke of other determined etiology | 48 (3.7%) | 31 (3.4%) | 17 (4.5%) |
| NIHSS at admission (median [IQR], mean ± SD) *Missing, n* | 2 [1 – 5], 4.1 ± 5.2 *49* | 2 [1 – 4], 3.2 ± 4.2 *29* | 4 [2 – 9], 6.3 ± 6.6 *20* | < 0.0001 |
| NIHSS at admission, n (%) |  |  |  | < 0.0001 |
| No stroke symptoms (0) | 259 (21.0%) | 209 (23.8%) | 50 (14.0%) |
| Minor stroke (1-4) | 612 (49.5%) | 470 (53.5%) | 142 (40.0%) |
| Moderate stroke (5-15) | 299 (24.2%) | 173 (19.7%) | 126 (35.2%) |
| Moderate/severe stroke (16-20) | 38 (3.1%) | 17 (1.9%) | 21 (5.9%) |
| Severe stroke (21-42) | 28 (2.3%) | 9 (1.0%) | 19 (5.3%) |
| *Missing* | *49 (3.8%)* | *29 (3.2%)* | *20 (5.3%)* |
| Treatment, n (%) |  |  |  | 0.5968 |
| IV tPA | 116 (9.0%) | 84 (9.3%) | 32 (8.5%) |
| Mechanical thrombectomy | 11 (0.9%) | 9 (1.0%) | 2 (0.5%) |
| IV tPA and mechanical thrombectomy | 17 (1.3%) | 10 (1.1%) | 7 (1.9%) |
| None | 1141 (88.8%) | 804 (88.6%) | 337 (89.2%) |
| IV tPA Treatment, n (%) | 133 (10.4%) | 94 (10.4%) | 39 (10.3%) | 1.0000 |
| TICI reperfusion score among thrombectomy treatments, n (%) |  |  |  | 0.0042 |
| mTCI 0 | 2 (7.1%) | 0 (0.00%) | 2 (22.2%) |
| mTICI 1 | 0 (0.00%) | 0 (0.00%) | 0 (0.00%) |
| mTICI 2A | 2 (7.1%) | 0 (0.00%) | 2 (22.2%) |
| mTICI 2B | 11 (39.3%) | 7 (36.8%) | 4 (44.4%) |
| mTICI 3 | 13 (46.4%) | 12 (63.2%) | 1 (11.1%) |
| Secondary intracerebral hemorrhage,  n (%) | 112 (8.7%) | 71 (7.8%) | 41 (10.9%) | 0.0833 |

*P-value: Continuous variables were compared using Wilcoxon rank-sum tests and categorical variables were compared using Fisher’s exact tests.

Table 5. Imputed data multivariable model for favorable functional outcome (all p < 0.05)

| **Odds Ratio Estimates (n = 1601)** | | | | |
| --- | --- | --- | --- | --- |
| **Effect** | **OR** | **95% CI** | | **P-Value** |
| WMH Volume (1 unit increase for volume ≤ 4) | 0.853 | 0.769 | 0.945 | 0.0005 |
| WMH Volume (1 unit increase for volume > 4) | 0.986 | 0.960 | 1.011 |
| Age | 0.971 | 0.961 | 0.981 | < 0.0001 |
| Female | 0.752 | 0.594 | 0.953 | 0.0181 |
| Diabetes Mellitus Type 2 | 0.632 | 0.497 | 0.804 | 0.0002 |
| Anemia | 0.446 | 0.328 | 0.606 | < 0.0001 |
| COPD | 0.650 | 0.460 | 0.918 | 0.0145 |
| Sleep Apnea | 0.670 | 0.464 | 0.968 | 0.0330 |
| LVO | 0.634 | 0.470 | 0.855 | 0.0029 |
| NIHSS at Admission: Minor vs No Symptoms | 0.745 | 0.534 | 1.041 | < 0.0001 |
| NIHSS at Admission: Moderate vs No Symptoms | 0.302 | 0.208 | 0.437 |
| NIHSS at Admission: Moderate/Severe vs No Symptoms | 0.117 | 0.059 | 0.235 |
| NIHSS at Admission: Severe vs No Symptoms | 0.075 | 0.032 | 0.175 |
| Treatment: Mechanical Thrombectomy vs None | 3.703 | 1.059 | 12.945 | 0.0050 |
| Treatment: IV tPA vs None | 1.942 | 1.255 | 3.006 |
| Treatment: IV tPA/Mechanical Thrombectomy vs None | 1.820 | 0.660 | 5.015 |

Table 6. Baseline demographic and stroke risk factor characteristics among all encounters without large vessel occlusion

|  | **Entire Cohort (n = 1248)** | **mRS 0-2 Favorable (n = 874)** | **mRS 3-6 Unfavorable (n = 374)** | **P-value*** |
| --- | --- | --- | --- | --- |
| Age (years) (median [IQR], mean ± SD) | 69 [59 – 78],  67.9 ± 13.5 | 67 [58 – 76],  66.1 ± 13.4 | 74 [64 – 82],  72.1 ± 12.9 | < 0.0001 |
| Females, n (%) | 612 (49.0%) | 412 (47.1%) | 200 (53.5%) | 0.0416 |
| History of hypertension, n (%) | 981 (78.6%) | 663 (75.9%) | 318 (85.0%) | 0.0003 |
| Diabetes mellitus type 2, n (%) | 504 (40.4%) | 317 (36.3%) | 187 (50.0%) | < 0.0001 |
| Dyslipidemia, n (%) | 894 (71.6%) | 626 (71.6%) | 268 (71.7%) | 1.0000 |
| Current or former smoker, n (%) *Missing, n* | 738 (59.5%) *8* | 510 (58.7%) *5* | 228 (61.5%) *3* | 0.3769 |
| Alcohol consumption, n (%) *Missing, n* | 430 (36.1%) *56* | 332 (39.7%) *38* | 98 (27.5%) *18* | <0.0001 |
| BMI ≥ 30, n (%) | 599 (48.0%) | 414 (47.4%) | 185 (49.5%) | 0.5363 |
| Peripheral vascular disease, n (%) | 115 (9.2%) | 70 (8.0%) | 45 (12.0%) | 0.0321 |
| Coronary artery disease, n (%) | 379 (30.4%) | 239 (27.4%) | 140 (37.4%) | 0.0005 |
| Atrial fibrillation, n (%) | 273 (21.9%) | 167 (19.1%) | 106 (28.3%) | 0.0004 |
| Carotid stenosis, n (%) | 416 (33.3%) | 305 (34.9%) | 111 (29.7%) | 0.0770 |
| Intracranial atherosclerotic stenosis, n (%) | 327 (26.2%) | 230 (26.3%) | 97 (25.9%) | 0.9440 |
| Anemia, n (%) | 204 (16.4%) | 108 (12.4%) | 96 (25.7%) | < 0.0001 |
| Pro-coagulant coagulation disorder, n (%) | 54 (4.3%) | 33 (3.8%) | 21 (5.6%) | 0.1709 |
| COPD, n (%) | 141 (11.3%) | 84 (9.6%) | 57 (15.2%) | 0.0061 |
| Sleep apnea, n (%) | 141 (11.3%) | 86 (9.8%) | 55 (14.7%) | 0.0147 |
| Family history of stroke, n (%) | 279 (22.4%) | 187 (21.4%) | 92 (24.6%) | 0.2354 |
| Prior TIA, n (%) | 153 (12.3%) | 103 (11.8%) | 50 (13.4%) | 0.4515 |
| Prior stroke (hemorrhagic or ischemic), n (%) | 260 (20.8%) | 157 (18.0%) | 103 (27.5%) | 0.0002 |

*P-value: Continuous variables were compared using Wilcoxon rank-sum tests and categorical variables were compared using Fisher’s exact tests.

Table 7. Imaging, stroke, and treatment characteristics among all encounters without large vessel occlusion

|  | **Entire Cohort (n = 1248)** | **mRS 0-2 Favorable (n = 874)** | **mRS 3-6 Unfavorable (n = 374)** | **P-value*** |
| --- | --- | --- | --- | --- |
| White matter hyperintensity volume (median [IQR]) *Missing, n* | 3.28 [1.13 – 7.72] *243* | 2.70 [0.91 – 6.68] *135* | 4.83 [2.29 – 10.77] *108* | < 0.0001 |
| TOAST Subtype, n (%) |  |  |  | 0.6037 |
| Cardioembolism | 392 (31.4%) | 271 (31.0%) | 121 (32.4%) |
| Large-artery atherosclerosis | 202 (16.2%) | 145 (16.6%) | 57 (15.2%) |
| Small vessel occlusion | 259 (20.8%) | 189 (21.6%) | 70 (18.7%) |
| Stroke of undetermined etiology | 351 (28.1%) | 241 (27.6%) | 110 (29.4%) |
| Stroke of other determined etiology | 44 (3.5%) | 28 (3.2%) | 16 (4.3%) |
| NIHSS at admission (median [IQR]) *Missing, n* | 2 [1 – 5] 61 | 2 [1 – 4] 30 | 4 [1 – 7] 31 | < 0.0001 |
| NIHSS at admission, n (%) |  |  |  | < 0.0001 |
| No stroke symptoms (0) | 262 (22.1%) | 206 (24.4%) | 56 (16.3%) |
| Minor stroke (1-4) | 610 (51.4%) | 457 (54.1%) | 153 (44.6%) |
| Moderate stroke (5-15) | 283 (23.8%) | 171 (20.3%) | 112 (32.7%) |
| Moderate/severe stroke (16-20) | 16 (1.3%) | 5 (0.6%) | 11 (3.2%) |
| Severe stroke (21-42) | 16 (1.3%) | 5 (0.6%) | 11 (3.2%) |
| *Missing* | *61* | *30* | *31* |
| Treatment, n (%) |  |  |  | 0.1440 |
| IV tPA | 121 (9.7%) | 92 (10.5%) | 29 (7.8%) |
| Mechanical thrombectomy | 0 (0.0%) | 0 (0.0%) | 0 (0.0%) |
| IV tPA and mechanical thrombectomy | 0 (0.0%) | 0 (0.0%) | 0 (0.0%) |
| None | 1127 (90.3%) | 782 (89.5%) | 345 (92.2%) |
| IV tPA Treatment, n (%) | 121 (9.7%) | 92 (10.5%) | 29 (7.7%) | 0.1440 |
| Secondary intracerebral hemorrhage,  n (%) | 76 (6.1%) | 47 (5.4%) | 29 (7.8%) | 0.1209 |

*P-value: Continuous variables were compared using Wilcoxon rank-sum tests and categorical variables were compared using Fisher’s exact tests.

Table 8. Imputed data multivariable model results for favorable functional outcome for encounters without large vessel occlusion (all p < 0.05)

| **Odds Ratio Estimates for Not LVO Encounters  (n = 1248)** | | | | |
| --- | --- | --- | --- | --- |
| **Effect** | **OR** | **95% CI** | | **P-Value** |
| WMH Volume (1 unit increase for volume ≤ 4) | 0.841 | 0.735 | 0.962 | 0.0005 |
| WMH Volume (1 unit increase for volume > 4) | 0.976 | 0.951 | 1.002 |
| Age | 0.969 | 0.957 | 0.981 | <.0001 |
| Female | 0.748 | 0.572 | 0.978 | 0.034 |
| Diabetes Mellitus Type 2 | 0.598 | 0.456 | 0.784 | 0.0002 |
| Carotid Stenosis | 1.573 | 1.179 | 2.100 | 0.0021 |
| Anemia | 0.482 | 0.345 | 0.672 | < 0.0001 |
| Sleep Apnea | 0.623 | 0.416 | 0.932 | 0.0213 |
| NIHSS at Admission: Minor vs No Symptoms | 0.895 | 0.624 | 1.282 | < 0.0001 |
| NIHSS at Admission: Moderate vs No Symptoms | 0.373 | 0.250 | 0.556 |
| NIHSS at Admission: Moderate/Severe vs No Symptoms | 0.109 | 0.034 | 0.350 |
| NIHSS at Admission: Severe vs No Symptoms | 0.160 | 0.050 | 0.513 |

Table 9. Baseline demographic and stroke risk factor characteristics among all encounters with large vessel occlusion

|  | **Entire Cohort (n = 353)** | **mRS 0-2 Favorable (n = 200)** | **mRS 3-6 Unfavorable (n = 153)** | **P-value*** |
| --- | --- | --- | --- | --- |
| Age (years) (median [IQR], mean ± SD) | 67 [58 – 77],  67.2 ± 13.2 | 64 [53 – 73],  63.7 ± 12.9 | 73 [63 – 82],  71.8 ± 12.2 | < 0.0001 |
| Females, n (%) | 176 (49.9%) | 90 (45.0%) | 86 (56.2%) | 0.0415 |
| History of hypertension, n (%) | 283 (80.2%) | 151 (75.5%) | 132 (86.3%) | 0.0150 |
| Diabetes mellitus type 2, n (%) | 117 (33.1%) | 58 (29.0%) | 59 (38.6%) | 0.0680 |
| Dyslipidemia, n (%) | 254 (72.0%) | 132 (66.0%) | 122 (79.7%) | 0.0058 |
| Current or former smoker, n (%) *Missing, n* | 216 (65.1%) *21* | 138 (71.1%) *6* | 78 (56.5%) *15* | 0.0072 |
| Alcohol consumption, n (%) *Missing, n* | 122 (38.1%) 33 | 75 (40.8%) 16 | 47 (34.6%) 17 | 0.2951 |
| BMI ≥ 30, n (%) | 156 (44.2%) | 94 (47.0%) | 62 (40.5%) | 0.2358 |
| Peripheral vascular disease, n (%) | 46 (13.0%) | 22 (11.0%) | 24 (15.7%) | 0.2054 |
| Coronary artery disease, n (%) | 98 (27.8%) | 47 (23.5%) | 51 (33.3%) | 0.0426 |
| Atrial fibrillation, n (%) | 82 (23.2%) | 30 (15.0%) | 52 (34.0%) | < 0.0001 |
| Carotid stenosis, n (%) | 191 (54.1%) | 103 (51.5%) | 88 (57.5%) | 0.2821 |
| Intracranial atherosclerotic stenosis, n (%) | 156 (44.2%) | 88 (44.0%) | 68 (44.4%) | 1.0000 |
| Anemia, n (%) | 39 (11.0%) | 12 (6.0%) | 27 (17.7%) | 0.0009 |
| Pro-coagulant coagulation disorder, n (%) | 17 (4.8%) | 9 (4.5%) | 8 (5.2%) | 0.8050 |
| COPD, n (%) | 47 (13.3%) | 20 (10.0%) | 27 (17.7%) | 0.0405 |
| Sleep apnea, n (%) | 29 (8.2%) | 16 (8.0%) | 13 (8.5%) | 1.0000 |
| Family history of stroke, n (%) | 79 (22.4%) | 37 (18.5%) | 42 (27.5%) | 0.0533 |
| Prior TIA, n (%) | 38 (10.8%) | 17 (8.5%) | 21 (13.7%) | 0.1226 |
| Prior stroke (hemorrhagic or ischemic), n (%) | 82 (23.2%) | 43 (21.5%) | 39 (25.5%) | 0.4456 |

*P-value: Continuous variables were compared using Wilcoxon rank-sum tests and categorical variables were compared using Fisher’s exact tests.

Table 10. Imaging, stroke, and treatment characteristics among all encounters with large vessel occlusion

|  | **Entire Cohort (n = 353)** | **mRS 0-2 Favorable (n = 200)** | **mRS 3-6 Unfavorable (n = 153)** | **P-value*** |
| --- | --- | --- | --- | --- |
| White matter hyperintensity volume (median [IQR]) *Missing, n* | 2.56 [0.67 – 6.25] *73* | 1.66 [0.43 – 5.51] *32* | 3.90 [1.40 – 7.20] *41* | 0.0011 |
| Anterior (IM1M2) LVO, n (%) | 241 (68.3%) | 131 (65.5%) | 110 (71.9%) | 0.2069 |
| TOAST Subtype, n (%) |  |  |  | 0.0291 |
| Cardioembolism | 98 (27.8%) | 44 (22.0%) | 54 (35.3%) |
| Large-artery atherosclerosis | 183 (51.8%) | 114 (57.0%) | 69 (45.1%) |
| Small vessel occlusion | 0 (0.0%) | 0 (0.0%) | 0 (0.0%) |
| Stroke of undetermined etiology | 61 (17.3%) | 34 (17.0%) | 27 (17.7%) |
| Stroke of other determined etiology | 11 (3.1%) | 8 (4.0%) | 3 (2.0%) |
| NIHSS at admission (median [IQR]) *Missing, n* | 5 [2 – 13] *12* | 3 [1 – 8] *6* | 8 [3 – 18] *6* | < 0.0001 |
| NIHSS at admission, n (%) |  |  |  | < 0.0001 |
| No stroke symptoms (0) | 47 (13.8%) | 40 (20.6%) | 7 (4.8%) |
| Minor stroke (1-4) | 118 (34.6%) | 79 (40.7%) | 39 (26.5%) |
| Moderate stroke (5-15) | 101 (29.6%) | 52 (26.8%) | 49 (33.3%) |
| Moderate/severe stroke (16-20) | 43 (12.6%) | 16 (8.2%) | 27 (18.4%) |
| Severe stroke (21-42) | 32 (9.4%) | 7 (3.6%) | 25 (17.0%) |
| *Missing* | *12* | *6* | *6* |
| Treatment, n (%) |  |  |  | 0.4829 |
| IV tPA | 30 (8.5%) | 18 (9.0%) | 12 (7.8%) |
| Mechanical thrombectomy | 15 (4.3%) | 9 (4.5%) | 6 (3.9%) |
| IV tPA and mechanical thrombectomy | 24 (6.8%) | 10 (5.0%) | 14 (9.2%) |
| None | 284 (80.5%) | 163 (81.5%) | 121 (79.1%) |
| IV tPA Treatment, n (%) | 54 (15.3%) | 28 (14.0%) | 26 (17.0%) | 0.4586 |
| TICI reperfusion score among thrombectomy treatments, n (%) |  |  |  | 0.0074 |
| mTCI 0 | 6 (15.4%) | 0 (0.00%) | 6 (30.0%) |
| mTICI 1 | 0 (0.00%) | 0 (0.00%) | 0 (0.00%) |
| mTICI 2A | 2 (5.1%) | 0 (0.0%) | 2 (10.0%) |
| mTICI 2B | 14 (35.9%) | 7 (36.8%) | 7 (35.0%) |
| mTICI 3 | 17 (43.6%) | 12 (63.2%) | 5 (25.0%) |
| Secondary intracerebral hemorrhage,  n (%) | 54 (15.3%) | 28 (14.0%) | 26 (17.0%) | 0.4586 |

*P-value: Continuous variables were compared using Wilcoxon rank-sum tests and categorical variables were compared using Fisher’s exact tests.

Table 11. Imputed data multivariable model for favorable functional outcome for encounters with large vessel occlusion (all p < 0.05)

| **Odds Ratio Estimates for LVO Encounters  (n = 353)** | | | | |
| --- | --- | --- | --- | --- |
| **Effect** | **OR** | **95% CI** | | **P-Value** |
| WMH Volume (1 unit increase for volume ≤ 4) | 0.741 | 0.595 | 0.923 | 0.0065 |
| WMH Volume (1 unit increase for volume > 4) | 1.066 | 0.993 | 1.144 |
| Age | 0.972 | 0.952 | 0.994 | 0.0114 |
| Dyslipidemia | 0.495 | 0.274 | 0.895 | 0.0199 |
| Smoking Ever vs Never | 2.504 | 1.418 | 4.424 | 0.0016 |
| Anemia | 0.231 | 0.093 | 0.573 | 0.0016 |
| COPD | 0.426 | 0.199 | 0.912 | 0.0280 |
| Family History of Stroke | 0.508 | 0.278 | 0.929 | 0.0279 |
| NIHSS at Admission: Minor vs No Symptoms | 0.333 | 0.126 | 0.877 | < 0.0001 |
| NIHSS at Admission: Moderate vs No Symptoms | 0.166 | 0.061 | 0.452 |
| NIHSS at Admission: Moderate/Severe vs No Symptoms | 0.087 | 0.028 | 0.271 |
| NIHSS at Admission: Severe vs No Symptoms | 0.047 | 0.013 | 0.170 |
